# Supplementary material
Source: publisher figshare collection journal article supplement (https://sage.figshare.com/ndownloader/files/23804916)
Supplement: Supplementary file 1 [file 23804916]

Supplementary table 1. International Classification of Disease-9 Description for Congenital Heart malformations

| ICD9   | ICD9 Description CHD                          | ICD9  | ICD9 Description Surgical Procedures                             |
|--------|-----------------------------------------------|-------|------------------------------------------------------------------|
| 426.0  | Atrioventricular block complete               | 35.00 | Closed heart valvotomy, unspecified valve                        |
| 426.1  | Atrioventricular block, other and unspecified | 35.01 | Closed heart valvotomy, aortic valve                             |
| 426.10 | Atrioventricular block NOS                    | 35.02 | Closed heart valvotomy, mitral valve                             |
| 426.11 | Atrioventricular block-1st degree             | 35.03 | Closed heart valvotomy, pulmonary valve                          |
| 426.12 | Atrioventricular block-mobitz ii              | 35.04 | Closed heart valvotomy, tricuspid valve                          |
| 426.13 | Atrioventricular block-2nd degree NEC         | 35.10 | Open heart valvuloplasty without replacement, unspecified valve  |
| 426.50 | Bundle branch block NOS                       | 35.11 | Open heart valvuloplasty of aortic valve without replacement     |
| 427.0  | Paroxysmal atrial tachycardia                 | 35.12 | Open heart valvuloplasty of mitral valve without replacement     |
| 427.1  | Paroxysmal ventricular tachycardia            | 35.13 | Open heart valvuloplasty of pulmonary valve without replacement  |
| 427.2  | Paroxysmal tachycardia NOS                    | 35.14 | Open heart valvuloplasty of tricuspid valve without replacement  |
| 427.3  | Atrial fibrillation and flutter               | 35.20 | Replacement of unspecified heart valve                           |
| 427.31 | Atrial fibrillation                           | 35.21 | Replacement of aortic valve with tissue graft                    |
| 427.32 | Atrial flutter                                | 35.22 | Other replacement of aortic valve                                |
| 427.4  | Ventricular fibrillation and flutter          | 35.23 | Replacement of mitral valve with tissue graft                    |
| 427.41 | Ventricular fibrillation                      | 35.24 | Other replacement of mitral valve                                |
| 427.42 | Ventricular flutter                           | 35.25 | Replacement of pulmonary valve with tissue graft                 |
| 428.0  | Congestive heart failure NOS                  | 35.26 | Other replacement of pulmonary valve                             |
| 428.1  | Left heart failure                            | 35.27 | Replacement of tricuspid valve with tissue graft                 |
| 428.2  | Systolic heart failure                        | 35.28 | Other replacement of tricuspid valve                             |
| 428.20 | Systolic heart failure NOS                    | 35.31 | Operations on papillary muscle                                   |
| 428.21 | Acute systolic heart failure                  | 35.32 | Operations on chordae tendineae                                  |
| 428.22 | Chronic systolic heart failure                | 35.33 | Annuloplasty                                                     |
| 428.23 | Acute on chronic systolic heart failure       | 35.34 | Infundibulectomy                                                 |
| 428.3  | Diastolic heart failure                       | 35.35 | Operations on trabeculae carnae cordis                           |
| 428.30 | Diastolic heart failure NOS                   | 35.39 | Operations on other structures adjacent to valves of heart       |
| 428.31 | Acute diastolic heart failure                 | 35.41 | Enlargement of existing atrial septal defect                     |
| 428.32 | Chronic diastolic heart failure               | 35.42 | Creation of septal defect in heart                               |
| 428.33 | Acute on chronic diastolic heart failure      | 35.50 | Repair of unspecified septal defect of heart with prosthesis     |
| 428.4  | Combined systolic and diastolic heart failure | 35.51 | Repair of atrial septal defect with prosthesis, open technique   |
| 428.40 | Systolic/diastolic heart failure NOS          | 35.52 | Repair of atrial septal defect with prosthesis, closed technique |
| 428.41 | Acute systolic/diastolic heart failure        | 35.53 | Repair of ventricular septal defect with prosthesis              |
| 428.42 | Chronic systolic/diastolic heart failure      | 35.54 | Repair of endocardial cushion defect with prosthesis             |

|        |                                                           |       |                                                                              |
|--------|-----------------------------------------------------------|-------|------------------------------------------------------------------------------|
| 428.43 | Acute/chronic systolic/diastolic heart failure            | 35.60 | Repair of unspecified septal defect of heart with tissue graft               |
| 428.9  | Heart failure NOS                                         | 35.61 | Repair of atrial septal defect with tissue graft                             |
| 584.9  | Acute kidney failure NOS                                  | 35.62 | Repair of ventricular septal defect with tissue graft                        |
| 585.9  | Chronic kidney disease NOS                                | 35.63 | Repair of endocardial cushion defect with tissue graft                       |
| 745.0  | Common arterial trunk                                     | 35.70 | Other and unspecified repair of unspecified septal defect of heart           |
| 745.10 | Complete transposition of the great vessels               | 35.71 | Other and unspecified repair of atrial septal defect                         |
| 745.11 | Double outlet right ventricle                             | 35.72 | Other and unspecified repair of ventricular septal defect                    |
| 745.12 | Congenitally corrected transposition of the great vessels | 35.73 | Other and unspecified repair of endocardial cushion defect                   |
| 745.19 | Transposition of the great vessels NEC                    | 35.81 | Total repair of tetralogy of Fallot                                          |
| 745.5  | Secundum atrial septal defect                             | 35.82 | Total repair of total anomalous pulmonary venous connection                  |
| 745.60 | Endocardial cushion defect NOS                            | 35.83 | Total repair of truncus arteriosus                                           |
| 745.61 | Ostium primum defect                                      | 35.84 | Total correction of transposition of great vessels, not elsewhere classified |
| 745.69 | Atrioventricular septal defect                            | 35.91 | Interatrial transposition of venous return                                   |
| 746.01 | Congenital pulmonary valve atresia                        | 35.92 | Creation of conduit between right ventricle and pulmonary artery             |
| 746.1  | Congenital tricuspid atresia/stenosis                     | 35.93 | Creation of conduit between left ventricle and aorta                         |
| 746.2  | Ebstein's anomaly                                         | 35.94 | Creation of conduit between atrium and pulmonary artery                      |
| 746.7  | Hypoplastic left heart syndrome                           | 35.95 | Revision of corrective procedure on heart                                    |
| 746.85 | Coronary artery anomaly                                   | 35.98 | Other operations on septa of heart                                           |
| 747.41 | Total anomalous pulmonary venous connection               | 35.99 | Other operations on valves of heart                                          |
| 747.42 | Partial anomalous pulmonary venous connection             | 36.99 | Other operations on vessel of heart                                          |
|        |                                                           | 37.33 | Excision or destruction of other lesion or tissue of heart                   |
|        |                                                           | 37.5  | Heart replacement procedures                                                 |
|        |                                                           | 37.51 | Heart transplantation                                                        |
|        |                                                           | 37.52 | Implantation of total replacement heart system                               |
|        |                                                           | 39.0  | Systemic to pulmonary artery shunt                                           |
|        |                                                           | 39.21 | Caval-pulmonary artery anastomosis                                           |

*Note: CHD, Congenital Heart Disease; ICD9, International Classification of Disease-9; NEC, not elsewhere classifiable; NOS, not otherwise specified*
